# Supplementary material for: Genome-Wide Identification and Characterization of the NAC Transcription Factor Family in Musa Acuminata and Expression Analysis during Fruit Ripening
Source: PubMed Central journal article supplement (PMC7013864; doi:10.3390/ijms21020634), 2020-01-18
Supplement: ijms-21-00634-s001.pdf [file ijms-21-00634-s001.pdf]

Article

# Genome-wide identification and characterization of the NAC transcription factor family in *Musa acuminata* and expression analysis during fruit ripening

Bin Li <sup>1,2,3</sup>, Ruiyi Fan <sup>2,3</sup>, Qiaosong Yang <sup>2,3</sup>, Chunhua Hu <sup>2,3</sup>, Ou Sheng <sup>2,3</sup>, Guiming Deng <sup>2,3</sup>, Tao Dong <sup>2,3</sup>, Chunyu Li <sup>2,3</sup>, Xinxiang Peng <sup>1</sup>, Fangcheng Bi <sup>2,3,\*</sup> and Ganjun Yi <sup>2,3,\*</sup>

<sup>1</sup> State Key Laboratory for Conservation and Utilization of Subtropical Agro-bioresources, College of Life Sciences, South China Agricultural University, Guangzhou 510642, China; binxiuke2343@126.com (B.L.); xpeng@scau.edu.cn (X.P.)

<sup>2</sup> Key Laboratory of South Subtropical Fruit Biology and Genetic Resource Utilization(MOA), Institute of Fruit Tree Research, Guangdong Academy of Agricultural Sciences; Guangzhou 510640, China

<sup>3</sup> Guangdong Province Key Laboratory of Tropical and Subtropical Fruit Tree Research, Institute of Fruit Tree Research, Guangdong Academy of Agricultural Sciences; Guangzhou 510640, China; fanruiyi@outlook.com (R.F.); yangqiaosong@gdaas.cn (Q.Y.); huchunhua@gdaas.cn (C.H.); shengou@gdaas.cn (O.S.); dengguiming@gdaas.cn (G.D.); dongtao@gdaas.cn (T.D.); lichunyu@gdaas.cn (C.L.)

\* Correspondence: bifangcheng@gdaas.cn (F.B.); yiganjun@vip.163.com (G.Y.)

### Motif 1

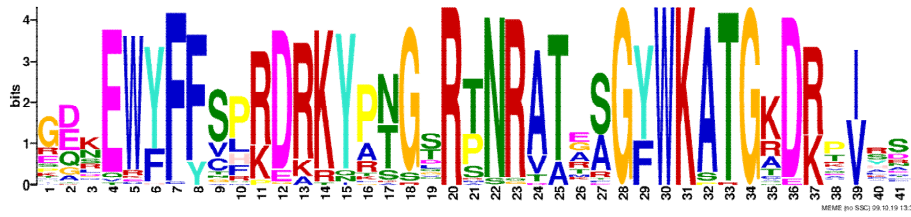

### Motif 2

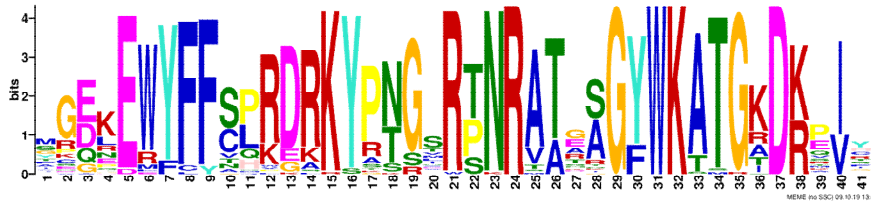

### Motif 3

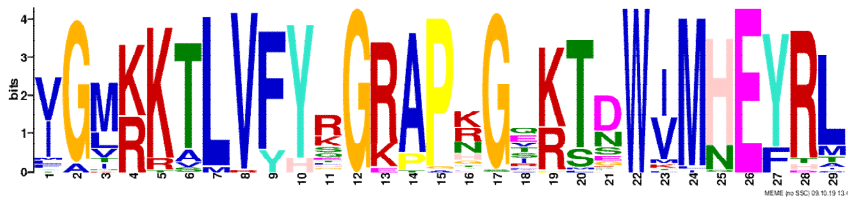

### Motif 4

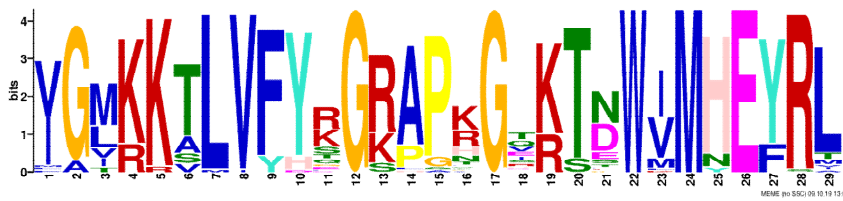

### Motif 5

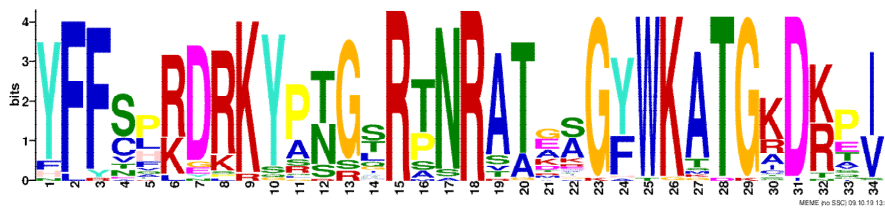

### Motif 6

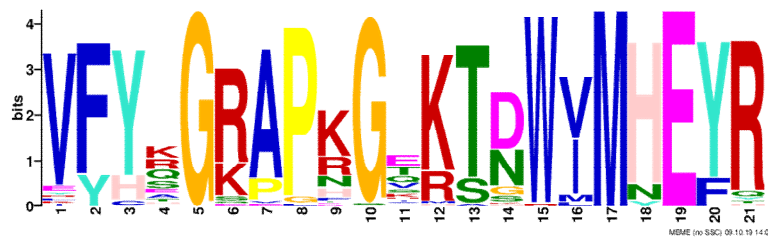

### Motif 7

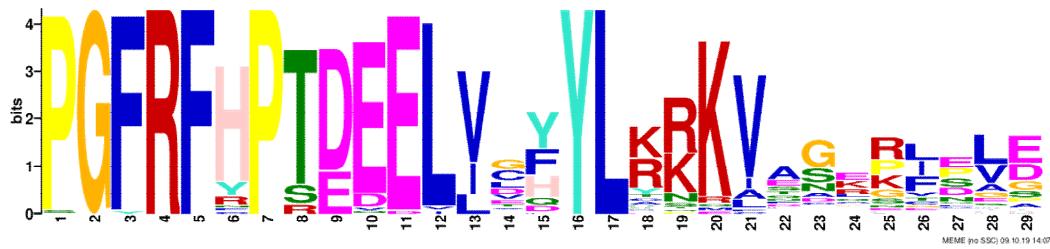

### Motif 8

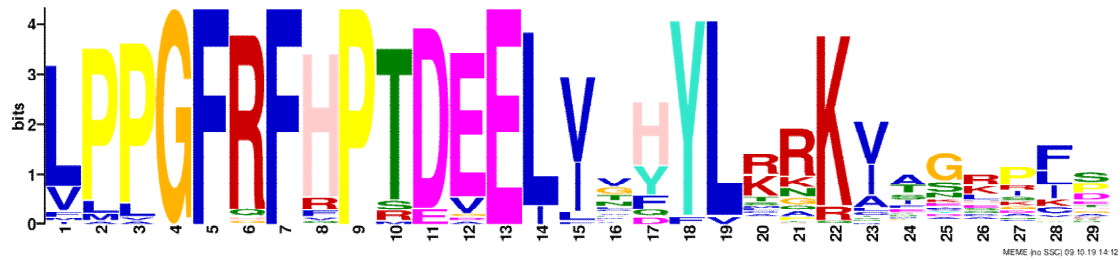

### Motif 9

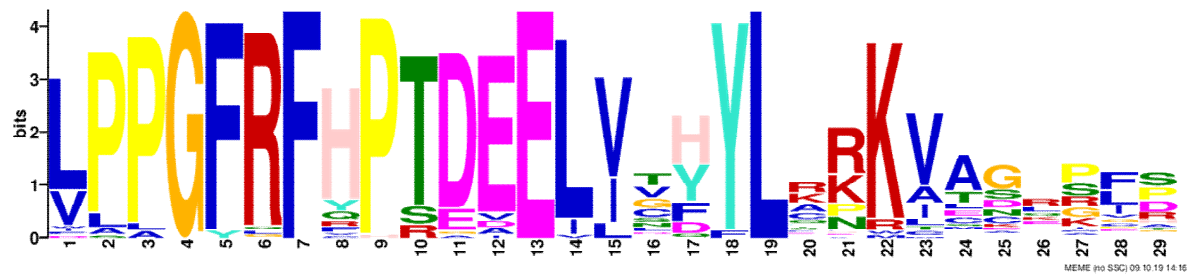

### Motif 10

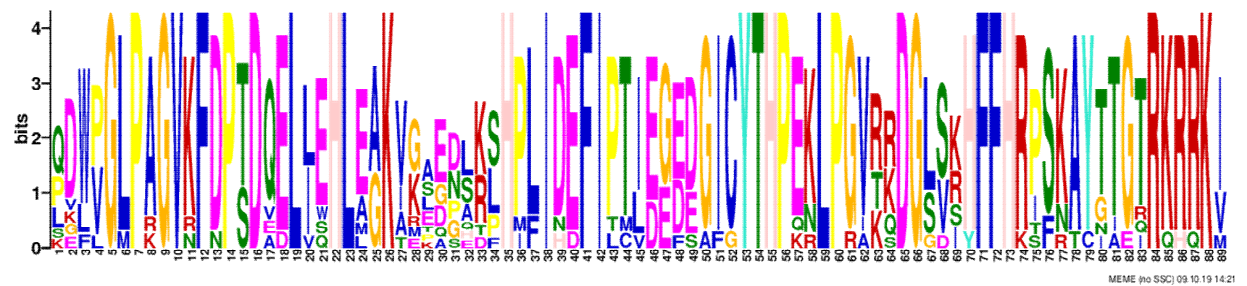

**Figure S1.** Sequence logos for the conserved motifs of banana NAC domain proteins. Conserved motifs and the sequence logos were generated using the MEME search tool. Numbers on the horizontal axis represent the sequence positions in the motifs and the vertical axis represents the information content measured in bits.

**Table S1.** Reported NAC genes from *Musa acuminata* in literatures.

| Gene symbol | Annotation numbers | AAs | Mw      | pI    | Description                                     |
|-------------|--------------------|-----|---------|-------|-------------------------------------------------|
| MaNAC001    | Ma0101430.1        | 457 | 48763.5 | 4.28  | Hypothetical protein                            |
| MaNAC002    | Ma0101440.1        | 124 | 13487.2 | 9.43  | Putative NAC domain-containing protein 41       |
| MaNAC003    | Ma0104220.1        | 392 | 42789.3 | 8.7   | Putative NAC transcription factor NAM-2         |
| MaNAC004    | Ma0104590.1        | 292 | 33343.2 | 5.41  | No apical meristem protein, putative, expressed |
| MaNAC005    | Ma0111390.1        | 218 | 24632.3 | 8.88  | Putative NAC domain-containing protein 68       |
| MaNAC006    | Ma0113870.1        | 278 | 31361.2 | 4.71  | No apical meristem protein, putative, expressed |
| MaNAC007    | Ma0200690.1        | 308 | 33180.9 | 8.33  | Hypothetical protein                            |
| MaNAC008    | Ma0201530.1        | 264 | 29553.7 | 5.23  | No apical meristem protein, putative, expressed |
| MaNAC009    | Ma0201890.1        | 328 | 36854.4 | 7.53  | NAC transcription factor 29                     |
| MaNAC010    | Ma0202630.1        | 328 | 37252.1 | 8.72  | Uncharacterized protein                         |
| MaNAC011    | Ma0206010.1        | 673 | 74415.3 | 4.63  | No apical meristem protein, putative, expressed |
| MaNAC012    | Ma0207640.1        | 325 | 36226.5 | 8.37  | Protein BEARSKIN2                               |
| MaNAC013    | Ma0208540.1        | 393 | 44116.4 | 4.42  | No apical meristem protein, putative, expressed |
| MaNAC014    | Ma0209680.1        | 119 | 13448.4 | 10.16 | Putative NAC transcription factor 92            |
| MaNAC015    | Ma0209690.1        | 182 | 20625.6 | 10.01 | Putative NAC transcription factor 29            |
| MaNAC016    | Ma0210970.1        | 286 | 32176.9 | 7.19  | Uncharacterized protein                         |
| MaNAC017    | Ma0213650.1        | 637 | 69809.4 | 5.08  | Uncharacterized protein                         |
| MaNAC018    | Ma0218350.1        | 417 | 47104.5 | 7.17  | No apical meristem protein, putative, expressed |
| MaNAC019    | Ma0221900.1        | 312 | 35563.1 | 7.56  | Protein SOMBRERO                                |
| MaNAC020    | Ma0223000.1        | 212 | 23683.8 | 9.26  | NAC domain-containing protein 83                |
| MaNAC021    | Ma0300260.1        | 724 | 80835.6 | 4.53  | No apical meristem protein, putative, expressed |
| MaNAC022    | Ma0300480.1        | 280 | 32175.1 | 5.04  | Putative Protein ATAF2                          |
| MaNAC023    | Ma0303310.1        | 200 | 22982.9 | 8.23  | NAC domain-containing protein 76                |
| MaNAC024    | Ma0305920.1        | 193 | 22206.2 | 4.33  | Putative NAC domain-containing protein 94       |
| MaNAC025    | Ma0307280.1        | 417 | 46481.5 | 5.14  | NAC domain-containing protein 8                 |
| MaNAC026    | Ma0308760.1        | 163 | 18007.2 | 9.1   | Putative Transcription factor JUNGBRUNNEN 1     |
| MaNAC027    | Ma0309370.1        | 319 | 36093.8 | 7.01  | Putative NAC domain-containing protein 100      |
| MaNAC028    | Ma0311950.1        | 384 | 42253.7 | 7.24  | NAC domain-containing protein 43                |
| MaNAC029    | Ma0313900.1        | 720 | 79555.7 | 4.52  | No apical meristem protein, putative, expressed |
| MaNAC030    | Ma0314290.1        | 632 | 69858.3 | 4.63  | No apical meristem protein, putative, expressed |
| MaNAC031    | Ma0315190.1        | 241 | 27472.7 | 4.7   | NAC domain-containing protein 45                |
| MaNAC032    | Ma0315340.1        | 290 | 33350.5 | 4.89  | No apical meristem protein, putative, expressed |
| MaNAC033    | Ma0319100.1        | 323 | 36416.5 | 8.45  | No apical meristem protein, putative, expressed |
| MaNAC034    | Ma0319110.1        | 294 | 33195.3 | 8.09  | No apical meristem protein, putative, expressed |
| MaNAC035    | Ma0319490.1        | 236 | 26412.5 | 8.67  | No apical meristem protein, putative, expressed |
| MaNAC036    | Ma0319830.1        | 303 | 33525.5 | 7.96  | NAC domain-containing protein 2                 |
| MaNAC037    | Ma0322620.1        | 357 | 39982.9 | 8.03  | No apical meristem protein, putative, expressed |
| MaNAC038    | Ma0323470.1        | 303 | 34712.5 | 6.35  | NAC domain-containing protein 76                |
| MaNAC039    | Ma0324610.1        | 281 | 31156.9 | 8.06  | Putative NAC domain-containing protein 21/22    |
| MaNAC040    | Ma0402440.1        | 335 | 37313.6 | 8.33  | No apical meristem protein, putative, expressed |
| MaNAC041    | Ma0402450.1        | 300 | 34302.2 | 7.02  | NAC domain-containing protein 68                |
| MaNAC042    | Ma0402750.1        | 289 | 31940   | 9.15  | NAC domain-containing protein 73                |
| MaNAC043    | Ma0407120.1        | 398 | 43847.9 | 4.91  | No apical meristem protein, putative, expressed |
| MaNAC044    | Ma0410270.1        | 294 | 33448.6 | 7.96  | NAC domain-containing protein 68                |
| MaNAC045    | Ma0419710.1        | 329 | 37608.2 | 5.33  | No apical meristem protein, putative, expressed |
| MaNAC046    | Ma0422510.1        | 273 | 31416   | 8.16  | Putative NAC domain-containing protein 102      |
| MaNAC047    | Ma0422610.1        | 373 | 41752.4 | 5.31  | No apical meristem protein, putative, expressed |
| MaNAC048    | Ma0423340.1        | 651 | 72939.2 | 4.89  | Uncharacterized protein                         |
| MaNAC049    | Ma0428500.1        | 188 | 21728.2 | 8.98  | Putative NAC transcription factor ONAC010       |
| MaNAC050    | Ma0429550.1        | 251 | 28758.1 | 8.04  | Putative NAC domain-containing protein 68       |
| MaNAC051    | Ma0435660.1        | 640 | 71150.1 | 4.41  | Uncharacterized protein                         |
| MaNAC052    | Ma0437470.1        | 408 | 46253.9 | 8.39  | No apical meristem protein, putative, expressed |

|          |             |      |          |       |                                                 |
|----------|-------------|------|----------|-------|-------------------------------------------------|
| MaNAC053 | Ma0438520.1 | 288  | 32776.3  | 6.85  | Transcription factor JUNGBRUNNEN 1              |
| MaNAC054 | Ma0500440.1 | 275  | 31401.1  | 8.2   | No apical meristem protein, putative, expressed |
| MaNAC055 | Ma0502120.1 | 309  | 34899.9  | 6.92  | Uncharacterized protein                         |
| MaNAC056 | Ma0503210.1 | 333  | 37159.4  | 5.16  | No apical meristem protein, putative, expressed |
| MaNAC057 | Ma0507350.1 | 314  | 35366.2  | 6.26  | NAC domain-containing protein 68                |
| MaNAC058 | Ma0507360.1 | 354  | 39843.8  | 6.88  | Putative NAC domain-containing protein 100      |
| MaNAC059 | Ma0516520.1 | 291  | 32633.2  | 5.64  | No apical meristem protein, putative, expressed |
| MaNAC060 | Ma0517940.1 | 283  | 32185.6  | 7.38  | Uncharacterized protein                         |
| MaNAC061 | Ma0520040.1 | 333  | 37746.1  | 7.79  | NAC domain-containing protein 86                |
| MaNAC062 | Ma0520080.1 | 262  | 30464.6  | 8.45  | Putative NAC domain-containing protein 102      |
| MaNAC063 | Ma0520400.1 | 368  | 40885.6  | 5.31  | No apical meristem protein, putative, expressed |
| MaNAC064 | Ma0521000.1 | 274  | 31045.8  | 6.42  | Putative NAC domain-containing protein 21/22    |
| MaNAC065 | Ma0521450.1 | 245  | 28184.5  | 6.69  | No apical meristem protein, putative, expressed |
| MaNAC066 | Ma0525980.1 | 481  | 53500.6  | 6.72  | Putative NAC domain-containing protein 74       |
| MaNAC067 | Ma0529000.1 | 300  | 33339.5  | 8.28  | NAC domain-containing protein 21/22             |
| MaNAC068 | Ma0603480.1 | 304  | 33684.8  | 6.52  | No apical meristem protein, putative, expressed |
| MaNAC069 | Ma0604360.1 | 408  | 46203.1  | 8.05  | No apical meristem protein, putative, expressed |
| MaNAC070 | Ma0604820.1 | 468  | 51702    | 7.09  | Putative NAC domain-containing protein 74       |
| MaNAC071 | Ma0607110.1 | 428  | 48189.6  | 8.04  | No apical meristem protein, putative, expressed |
| MaNAC072 | Ma0610180.1 | 348  | 39471.4  | 7.02  | NAC domain-containing protein 100               |
| MaNAC073 | Ma0612700.1 | 1031 | 114290   | 5.84  | Hypothetical protein                            |
| MaNAC074 | Ma0618050.1 | 248  | 27635.8  | 8.67  | Uncharacterized protein                         |
| MaNAC075 | Ma0619050.1 | 217  | 23865.3  | 5.22  | Putative NAC transcription factor ONAC010       |
| MaNAC076 | Ma0619100.1 | 291  | 32509.5  | 6.85  | NAC domain-containing protein 2                 |
| MaNAC077 | Ma0619970.1 | 193  | 21424    | 5.28  | Putative NAC transcription factor NAM-B1        |
| MaNAC078 | Ma0620050.1 | 275  | 30882.9  | 9.06  | NAC domain-containing protein 48                |
| MaNAC079 | Ma0620170.1 | 258  | 29077.5  | 8.36  | Uncharacterized protein                         |
| MaNAC080 | Ma0620690.1 | 246  | 27559.5  | 7.02  | No apical meristem protein, putative, expressed |
| MaNAC081 | Ma0622210.1 | 239  | 27204.5  | 8.7   | NAC domain-containing protein 83                |
| MaNAC082 | Ma0624750.1 | 572  | 64218    | 4.55  | Uncharacterized protein                         |
| MaNAC083 | Ma0625140.1 | 236  | 26677.8  | 8.48  | Uncharacterized protein                         |
| MaNAC084 | Ma0625530.1 | 151  | 17517.29 | 10.29 | Putative NAC domain-containing protein 2        |
| MaNAC085 | Ma0627170.1 | 275  | 30967.9  | 8.35  | NAC domain-containing protein 2                 |
| MaNAC086 | Ma0627580.1 | 198  | 21930.3  | 4.88  | Putative NAC transcription factor 29            |
| MaNAC087 | Ma0628730.1 | 284  | 31283    | 8.8   | Putative NAC domain-containing protein 8        |
| MaNAC088 | Ma0630630.1 | 320  | 35723.5  | 7.27  | Putative Protein BEARSKIN2                      |
| MaNAC089 | Ma0631760.1 | 286  | 31594.6  | 7.66  | Putative NAC domain-containing protein 21/22    |
| MaNAC090 | Ma0632230.1 | 326  | 36332.2  | 8.37  | NAC domain-containing protein 100               |
| MaNAC091 | Ma0633040.1 | 299  | 33111.6  | 8.77  | NAC domain-containing protein 21/22             |
| MaNAC092 | Ma0633280.1 | 298  | 33925.8  | 6.89  | No apical meristem protein, putative, expressed |
| MaNAC093 | Ma0633960.1 | 347  | 38469.7  | 5.13  | NAC domain-containing protein 100               |
| MaNAC094 | Ma0633980.1 | 346  | 39369.8  | 7.7   | NAC transcription factor 29                     |
| MaNAC095 | Ma0633990.1 | 271  | 31081.9  | 6.63  | NAC domain-containing protein 68                |
| MaNAC096 | Ma0638460.1 | 279  | 31665.8  | 5.51  | Putative NAC domain-containing protein 21/22    |
| MaNAC097 | Ma0638820.1 | 335  | 38720.3  | 6.67  | NAC domain-containing protein 7                 |
| MaNAC098 | Ma0700860.1 | 258  | 29034.6  | 7.24  | Uncharacterized protein                         |
| MaNAC099 | Ma0704130.1 | 293  | 33005    | 4.79  | No apical meristem protein, putative, expressed |
| MaNAC100 | Ma0706080.1 | 349  | 38988.3  | 7.98  | NAC domain-containing protein 43                |
| MaNAC101 | Ma0706730.1 | 335  | 39179.7  | 6.46  | NAC domain-containing protein 7                 |
| MaNAC102 | Ma0709340.1 | 422  | 47822.4  | 7.36  | No apical meristem protein, putative, expressed |
| MaNAC103 | Ma0711300.1 | 318  | 35930.1  | 7.01  | Putative NAC domain-containing protein 100      |
| MaNAC104 | Ma0719650.1 | 309  | 34651.2  | 7.93  | NAC domain-containing protein 100               |
| MaNAC105 | Ma0721160.1 | 317  | 35187.7  | 8.31  | No apical meristem protein, putative, expressed |
| MaNAC106 | Ma0723270.1 | 286  | 32115.8  | 7.25  | Uncharacterized protein                         |
| MaNAC107 | Ma0723280.1 | 299  | 34147.1  | 6.17  | NAC domain-containing protein 68                |
| MaNAC108 | Ma0723960.1 | 247  | 27401.8  | 9.08  | No apical meristem protein, putative, expressed |
| MaNAC109 | Ma0724640.1 | 279  | 31898.5  | 6.71  | NAC domain-containing protein 30                |

|          |             |     |         |       |                                                 |
|----------|-------------|-----|---------|-------|-------------------------------------------------|
| MaNAC110 | Ma0724710.1 | 306 | 34211.4 | 9.01  | NAC domain-containing protein 48                |
| MaNAC111 | Ma0724800.1 | 409 | 45728.7 | 4.35  | Putative NAC domain-containing protein 82       |
| MaNAC112 | Ma0725080.1 | 345 | 38848.2 | 8.91  | Uncharacterized protein                         |
| MaNAC113 | Ma0727560.1 | 406 | 45224.3 | 4.72  | No apical meristem protein, putative, expressed |
| MaNAC114 | Ma0801310.1 | 236 | 26928.7 | 9.6   | NAC domain-containing protein 90                |
| MaNAC115 | Ma0806900.1 | 302 | 33446.9 | 9.64  | No apical meristem protein, putative, expressed |
| MaNAC116 | Ma0809680.1 | 170 | 18953.4 | 7.86  | Putative NAC domain-containing protein 68       |
| MaNAC117 | Ma0811340.1 | 330 | 37941.4 | 7.01  | NAC domain-containing protein 7                 |
| MaNAC118 | Ma0811850.1 | 330 | 37760.4 | 4.98  | NAC domain-containing protein 37                |
| MaNAC119 | Ma0813840.1 | 608 | 68308   | 5.48  | Putative NAC domain-containing protein 86       |
| MaNAC120 | Ma0814960.1 | 274 | 30949.5 | 5.88  | No apical meristem protein, putative, expressed |
| MaNAC121 | Ma0817890.1 | 289 | 32046.1 | 8.8   | Uncharacterized protein                         |
| MaNAC122 | Ma0822240.1 | 280 | 31386.5 | 6.31  | No apical meristem protein, putative, expressed |
| MaNAC123 | Ma0825020.1 | 590 | 65340.4 | 4.45  | Putative NAC domain-containing protein 16       |
| MaNAC124 | Ma0825500.1 | 302 | 33417.5 | 7.71  | No apical meristem protein, putative, expressed |
| MaNAC125 | Ma0833630.1 | 284 | 31562.5 | 8.07  | No apical meristem protein, putative, expressed |
| MaNAC126 | Ma0900570.1 | 291 | 32295.3 | 9.22  | No apical meristem protein, putative, expressed |
| MaNAC127 | Ma0901160.1 | 220 | 24981.3 | 10.25 | NAC domain-containing protein 41                |
| MaNAC128 | Ma0901850.1 | 397 | 44460.5 | 6.16  | Putative NAC domain-containing protein 8        |
| MaNAC129 | Ma0904890.1 | 285 | 32349.3 | 8.98  | NAC transcription factor 29                     |
| MaNAC130 | Ma0909630.1 | 305 | 35060.9 | 5.79  | Putative NAC domain-containing protein 100      |
| MaNAC131 | Ma0909760.1 | 290 | 32137.4 | 8.47  | Putative NAC domain-containing protein 21/22    |
| MaNAC132 | Ma0913900.1 | 237 | 27056.5 | 9.37  | Putative NAC transcription factor 25            |
| MaNAC133 | Ma0917040.1 | 320 | 35992.5 | 6.95  | NAC domain-containing protein 100               |
| MaNAC134 | Ma0918740.1 | 318 | 35960.3 | 5.23  | CUP-SHAPED COTYLEDON3, putative, expressed      |
| MaNAC135 | Ma0919410.1 | 422 | 45913.6 | 8.32  | Putative NAC transcription factor NAM-B2        |
| MaNAC136 | Ma0920430.1 | 685 | 75370.8 | 4.41  | No apical meristem protein, putative, expressed |
| MaNAC137 | Ma0924060.1 | 658 | 72711.2 | 4.5   | No apical meristem protein, putative, expressed |
| MaNAC138 | Ma0924410.1 | 246 | 27982.1 | 5.22  | NAC domain-containing protein 45                |
| MaNAC139 | Ma0924910.1 | 356 | 40312   | 6.79  | NAC domain-containing protein 43                |
| MaNAC140 | Ma0926680.1 | 303 | 33772.3 | 7.82  | NAC domain-containing protein 21/22             |
| MaNAC141 | Ma0928160.1 | 336 | 37680.8 | 8.7   | NAC domain-containing protein 100               |
| MaNAC142 | Ma0930350.1 | 244 | 27453.6 | 9.62  | NAC domain-containing protein 90                |
| MaNAC143 | Ma1003880.1 | 496 | 53401.8 | 4.34  | Hypothetical protein                            |
| MaNAC144 | Ma1003900.1 | 435 | 46539.3 | 4.24  | Hypothetical protein                            |
| MaNAC145 | Ma1004160.1 | 334 | 37704   | 7.85  | Uncharacterized protein                         |
| MaNAC146 | Ma1004360.1 | 380 | 42916.9 | 4.59  | Putative NAC domain-containing protein 16       |
| MaNAC147 | Ma1004400.1 | 292 | 32039.7 | 8.43  | NAC domain-containing protein 48                |
| MaNAC148 | Ma1004550.1 | 248 | 27883.9 | 7.3   | Putative NAC domain-containing protein 61       |
| MaNAC149 | Ma1004910.1 | 331 | 37405.1 | 7.02  | Putative NAC domain-containing protein 100      |
| MaNAC150 | Ma1009160.1 | 332 | 37296.1 | 6.78  | Uncharacterized protein                         |
| MaNAC151 | Ma1009450.1 | 268 | 30563.4 | 8.2   | Uncharacterized protein                         |
| MaNAC152 | Ma1011090.1 | 207 | 22816.9 | 6.11  | Putative NAC transcription factor NAM-1         |
| MaNAC153 | Ma1012120.1 | 242 | 26793   | 8.85  | No apical meristem protein, putative, expressed |
| MaNAC154 | Ma1013020.1 | 303 | 34543.5 | 9.87  | Uncharacterized protein                         |
| MaNAC155 | Ma1014520.1 | 312 | 35778.5 | 8.46  | Protein SOMBRERO                                |
| MaNAC156 | Ma1016990.1 | 219 | 24835.9 | 7.97  | Putative NAC transcription factor NAM-2         |
| MaNAC157 | Ma1019880.1 | 321 | 35536.8 | 7.34  | No apical meristem protein, putative, expressed |
| MaNAC158 | Ma1021690.1 | 274 | 31795   | 9.09  | Protein SOMBRERO                                |
| MaNAC159 | Ma1022290.1 | 356 | 38456.1 | 8.45  | Protein CUP-SHAPED COTYLEDON 2                  |
| MaNAC160 | Ma1026130.1 | 333 | 36520.1 | 8.48  | Putative NAC domain-containing protein 59       |
| MaNAC161 | Ma1027550.1 | 250 | 28451.8 | 9.14  | No apical meristem protein, putative, expressed |
| MaNAC162 | Ma1029220.1 | 300 | 34191.2 | 8.41  | NAC domain-containing protein 68                |
| MaNAC163 | Ma1100790.1 | 279 | 31267.1 | 5.62  | No apical meristem protein, putative, expressed |
| MaNAC164 | Ma1101240.1 | 263 | 30153   | 9.41  | No apical meristem protein, putative, expressed |
| MaNAC165 | Ma1101340.1 | 393 | 44308.1 | 4.91  | NAC domain-containing protein 86                |
| MaNAC166 | Ma1102940.1 | 330 | 37836.4 | 5.35  | NAC domain-containing protein 37                |

|          |             |     |         |      |                                                 |
|----------|-------------|-----|---------|------|-------------------------------------------------|
| MaNAC167 | Ma1103600.1 | 311 | 35226.4 | 7.09 | Putative NAC domain-containing protein 7        |
| MaNAC168 | Ma1105590.1 | 254 | 28578.5 | 11   | Putative Transcription factor (Fragment)        |
| MaNAC169 | Ma1107480.1 | 713 | 79544.1 | 6.81 | Uncharacterized protein                         |
| MaNAC170 | Ma1108540.1 | 300 | 33853.6 | 9.18 | Putative Transcription factor JUNGBRUNNEN 1     |
| MaNAC171 | Ma1108570.1 | 439 | 49301.8 | 4.26 | No apical meristem protein, putative, expressed |
| MaNAC172 | Ma1115400.1 | 589 | 66648.9 | 7.25 | Putative NAC domain-containing protein 45       |
| MaNAC173 | Ma1116010.1 | 337 | 38921.3 | 6.45 | NAC domain-containing protein 7                 |
| MaNAC174 | Ma1116350.1 | 371 | 41078.7 | 5.75 | No apical meristem protein, putative, expressed |
| MaNAC175 | Ma1120940.1 | 202 | 23327.6 | 5.67 | Uncharacterized protein                         |
| MaNAC176 | Ma1121100.1 | 263 | 29588.1 | 5.05 | No apical meristem protein, putative, expressed |
| MaNAC177 | Ma1124060.1 | 306 | 33992.1 | 7.82 | Putative NAC domain-containing protein 21/22    |
| MaNAC178 | Ma1124870.1 | 319 | 36449.6 | 7.32 | No apical meristem protein, putative, expressed |
| MaNAC179 | Ma0101430.1 | 457 | 48763.5 | 4.28 | Hypothetical protein                            |
| MaNAC180 | Ma0001720.1 | 381 | 42594.4 | 5.06 | NAC domain-containing protein 43                |
| MaNAC181 | Ma0002930.1 | 399 | 44822.2 | 5.83 | Putative NAC domain-containing protein 8        |

**Table S2.** Segmentally duplicated MaNAC gene pairs.

| <b>Gene ID</b> | <b>Gene ID</b> |
|----------------|----------------|
| MaNAC181       | MaNAC128       |
| MaNAC004       | MaNAC059       |
| MaNAC019       | MaNAC155       |
| MaNAC041       | MaNAC107       |
| MaNAC043       | MaNAC113       |
| MaNAC074       | MaNAC153       |
| MaNAC107       | MaNAC162       |
| MaNAC118       | MaNAC166       |
| MaNAC081       | MaNAC127       |
| MaNAC089       | MaNAC091       |
| MaNAC091       | MaNAC140       |
| MaNAC105       | MaNAC124       |
| MaNAC146       | MaNAC171       |
| MaNAC064       | MaNAC163       |
| MaNAC011       | MaNAC136       |
| MaNAC041       | MaNAC044       |
| MaNAC091       | MaNAC131       |



**Table S3.** Collinear MaNAC gene pairs.

| <b>Gene ID</b> | <b>Gene ID</b> |
|----------------|----------------|
| MaNAC093       | MaNAC149       |
| MaNAC093       | MaNAC133       |
| MaNAC058       | MaNAC093       |
| MaNAC094       | MaNAC129       |
| MaNAC094       | MaNAC154       |
| MaNAC034       | MaNAC104       |
| MaNAC034       | MaNAC072       |
| MaNAC042       | MaNAC087       |
| MaNAC016       | MaNAC087       |
| MaNAC031       | MaNAC165       |
| MaNAC033       | MaNAC154       |
| MaNAC122       | MaNAC133       |
| MaNAC058       | MaNAC122       |
| MaNAC027       | MaNAC122       |
| MaNAC072       | MaNAC122       |
| MaNAC024       | MaNAC132       |
| MaNAC121       | MaNAC157       |
| MaNAC126       | MaNAC157       |
| MaNAC040       | MaNAC106       |
| MaNAC159       | MaNAC160       |
| MaNAC114       | MaNAC148       |
| MaNAC080       | MaNAC148       |
| MaNAC142       | MaNAC148       |
| MaNAC047       | MaNAC165       |
| MaNAC119       | MaNAC165       |
| MaNAC145       | MaNAC170       |
| MaNAC032       | MaNAC065       |
| MaNAC065       | MaNAC164       |
| MaNAC052       | MaNAC071       |
| MaNAC071       | MaNAC161       |
| MaNAC071       | MaNAC102       |
| MaNAC091       | MaNAC131       |
| MaNAC131       | MaNAC140       |
| MaNAC089       | MaNAC131       |
| MaNAC064       | MaNAC120       |
| MaNAC120       | MaNAC176       |
| MaNAC120       | MaNAC163       |
| MaNAC012       | MaNAC088       |
| MaNAC019       | MaNAC023       |
| MaNAC023       | MaNAC155       |
| MaNAC105       | MaNAC124       |
| MaNAC068       | MaNAC105       |
| MaNAC115       | MaNAC177       |
| MaNAC039       | MaNAC115       |
| MaNAC067       | MaNAC115       |
| MaNAC039       | MaNAC177       |
| MaNAC067       | MaNAC177       |
| MaNAC146       | MaNAC171       |
| MaNAC011       | MaNAC136       |
| MaNAC018       | MaNAC102       |
| MaNAC050       | MaNAC098       |
| MaNAC050       | MaNAC053       |
| MaNAC064       | MaNAC176       |

---

|          |          |
|----------|----------|
| MaNAC048 | MaNAC051 |
| MaNAC017 | MaNAC051 |
| MaNAC078 | MaNAC147 |
| MaNAC035 | MaNAC153 |
| MaNAC035 | MaNAC074 |
| MaNAC035 | MaNAC083 |
| MaNAC055 | MaNAC130 |
| MaNAC092 | MaNAC130 |
| MaNAC091 | MaNAC140 |
| MaNAC089 | MaNAC091 |
| MaNAC017 | MaNAC048 |
| MaNAC074 | MaNAC153 |
| MaNAC083 | MaNAC153 |
| MaNAC078 | MaNAC110 |
| MaNAC006 | MaNAC096 |
| MaNAC165 | MaNAC172 |
| MaNAC075 | MaNAC152 |
| MaNAC055 | MaNAC098 |
| MaNAC053 | MaNAC055 |
| MaNAC055 | MaNAC092 |
| MaNAC053 | MaNAC098 |
| MaNAC041 | MaNAC044 |
| MaNAC041 | MaNAC107 |
| MaNAC074 | MaNAC083 |
| MaNAC010 | MaNAC178 |
| MaNAC052 | MaNAC161 |
| MaNAC052 | MaNAC102 |
| MaNAC089 | MaNAC140 |
| MaNAC117 | MaNAC173 |
| MaNAC117 | MaNAC167 |
| MaNAC072 | MaNAC104 |
| MaNAC129 | MaNAC154 |
| MaNAC039 | MaNAC067 |
| MaNAC019 | MaNAC158 |
| MaNAC019 | MaNAC155 |
| MaNAC063 | MaNAC174 |
| MaNAC102 | MaNAC161 |
| MaNAC020 | MaNAC156 |
| MaNAC044 | MaNAC107 |
| MaNAC118 | MaNAC166 |
| MaNAC136 | MaNAC137 |
| MaNAC005 | MaNAC032 |
| MaNAC032 | MaNAC099 |
| MaNAC032 | MaNAC164 |
| MaNAC005 | MaNAC099 |
| MaNAC005 | MaNAC164 |
| MaNAC066 | MaNAC070 |
| MaNAC053 | MaNAC092 |
| MaNAC079 | MaNAC109 |
| MaNAC107 | MaNAC162 |
| MaNAC028 | MaNAC100 |
| MaNAC081 | MaNAC127 |
| MaNAC058 | MaNAC133 |
| MaNAC027 | MaNAC133 |
| MaNAC155 | MaNAC158 |
| MaNAC167 | MaNAC173 |
| MaNAC116 | MaNAC168 |

---

---

|          |          |
|----------|----------|
| MaNAC080 | MaNAC142 |
| MaNAC046 | MaNAC164 |
| MaNAC027 | MaNAC058 |
| MaNAC022 | MaNAC099 |
| MaNAC043 | MaNAC113 |
| MaNAC057 | MaNAC107 |
| MaNAC057 | MaNAC095 |

---

**Table S4.** The parameters of selection pressure on segmentally duplicated gene pairs of the MaNAC family.

| Gene ID  | Gene ID  | Ka        | Ks       | Ka/Ks    | Divergence time (Mya) |
|----------|----------|-----------|----------|----------|-----------------------|
| MaNAC181 | MaNAC128 | 0.141888  | 0.57179  | 0.248147 | 63.53222222           |
| MaNAC004 | MaNAC059 | 0.114398  | 0.605641 | 0.188888 | 67.29344444           |
| MaNAC019 | MaNAC155 | 0.0881073 | 0.736393 | 0.119647 | 81.82144444           |
| MaNAC041 | MaNAC107 | 0.105324  | 0.592176 | 0.17786  | 65.79733333           |
| MaNAC043 | MaNAC113 | 0.241341  | 0.508056 | 0.475029 | 56.45066667           |
| MaNAC074 | MaNAC153 | 0.095273  | 0.719969 | 0.132329 | 79.99655556           |
| MaNAC107 | MaNAC162 | 0.118983  | 0.617194 | 0.19278  | 68.57711111           |
| MaNAC118 | MaNAC166 | 0.0933115 | 0.581973 | 0.160336 | 64.66366667           |
| MaNAC081 | MaNAC127 | 0.160783  | 0.319079 | 0.503896 | 35.45322222           |
| MaNAC089 | MaNAC091 | 0.168851  | 0.468952 | 0.360061 | 52.10577778           |
| MaNAC091 | MaNAC140 | 0.104425  | 0.404794 | 0.25797  | 44.97711111           |
| MaNAC105 | MaNAC124 | 0.0999103 | 0.801044 | 0.124725 | 89.00488889           |
| MaNAC146 | MaNAC171 | 0.191449  | 0.475252 | 0.402838 | 52.80577778           |
| MaNAC064 | MaNAC163 | 0.139041  | 0.61259  | 0.226972 | 68.06555556           |
| MaNAC011 | MaNAC136 | 0.182734  | 0.432632 | 0.422377 | 48.07022222           |
| MaNAC041 | MaNAC044 | 0.12302   | 0.565754 | 0.217445 | 62.86155556           |
| MaNAC091 | MaNAC131 | 0.144529  | 0.317578 | 0.455098 | 35.28644444           |

Mya, million years ago

**Table S5.** Reported NAC genes from *Musa acuminata* in literatures (E represents ethylene, the number indicates the days after the treatment).

| Gene symbol | 0-pulp | E-1-pulp | E-3-pulp | E-5-pulp | 0-peel | E-1-peel | E-3-peel | E-5-peel |
|-------------|--------|----------|----------|----------|--------|----------|----------|----------|
| MaNAC001    | 0.00   | 0.00     | 0.02     | 0.17     | 0.00   | 0.02     | 0.00     | 0.05     |
| MaNAC002    | 0.00   | 0.00     | 0.00     | 0.00     | 0.00   | 0.00     | 0.00     | 0.00     |
| MaNAC003    | 4.47   | 0.57     | 0.22     | 0.13     | 8.54   | 0.87     | 0.89     | 2.51     |
| MaNAC004    | 0.00   | 0.00     | 0.00     | 0.00     | 0.00   | 0.00     | 0.00     | 0.00     |
| MaNAC005    | 0.00   | 0.00     | 0.00     | 0.00     | 0.00   | 0.00     | 0.00     | 0.00     |
| MaNAC006    | 0.04   | 0.00     | 0.00     | 0.00     | 0.00   | 0.00     | 0.00     | 0.00     |
| MaNAC007    | 0.00   | 0.00     | 0.00     | 0.00     | 0.00   | 0.00     | 0.00     | 0.00     |
| MaNAC008    | 1.92   | 1.43     | 0.88     | 1.71     | 0.10   | 0.16     | 0.59     | 3.68     |
| MaNAC009    | 10.77  | 13.92    | 12.58    | 10.18    | 15.83  | 92.85    | 129.29   | 105.25   |
| MaNAC010    | 0.00   | 0.00     | 0.00     | 0.00     | 0.06   | 0.02     | 0.07     | 0.02     |
| MaNAC011    | 5.18   | 7.78     | 8.90     | 11.01    | 9.01   | 6.97     | 9.84     | 9.56     |
| MaNAC012    | 0.00   | 0.00     | 0.00     | 0.00     | 0.00   | 0.00     | 0.00     | 0.00     |
| MaNAC013    | 0.57   | 1.54     | 0.82     | 0.51     | 1.91   | 1.35     | 1.14     | 1.89     |
| MaNAC014    | 0.00   | 0.00     | 0.00     | 0.00     | 0.00   | 0.00     | 0.00     | 0.00     |
| MaNAC015    | 0.00   | 0.00     | 0.00     | 0.00     | 0.00   | 0.00     | 0.00     | 0.00     |
| MaNAC016    | 8.41   | 16.82    | 157.12   | 237.05   | 1.08   | 29.13    | 142.07   | 130.64   |
| MaNAC017    | 0.07   | 0.05     | 0.03     | 0.03     | 0.18   | 0.01     | 0.01     | 0.10     |
| MaNAC018    | 0.02   | 0.00     | 0.01     | 0.01     | 0.01   | 0.01     | 0.02     | 0.01     |
| MaNAC019    | 0.00   | 0.00     | 0.03     | 0.00     | 0.00   | 0.00     | 0.00     | 0.00     |
| MaNAC020    | 6.74   | 2.62     | 1.09     | 0.96     | 7.01   | 6.99     | 2.30     | 1.48     |
| MaNAC021    | 0.51   | 1.36     | 1.87     | 2.42     | 2.67   | 1.39     | 1.34     | 2.42     |
| MaNAC022    | 0.00   | 0.00     | 0.00     | 0.00     | 0.03   | 0.21     | 0.00     | 0.00     |
| MaNAC023    | 0.00   | 0.00     | 0.00     | 0.00     | 0.00   | 0.00     | 0.00     | 0.00     |
| MaNAC024    | 0.00   | 0.00     | 0.00     | 0.00     | 0.00   | 0.00     | 0.00     | 0.00     |
| MaNAC025    | 0.60   | 0.90     | 3.33     | 3.17     | 1.93   | 2.76     | 2.98     | 7.41     |
| MaNAC026    | 0.00   | 0.07     | 0.13     | 0.63     | 0.06   | 0.00     | 0.00     | 0.00     |
| MaNAC027    | 5.90   | 20.35    | 5.62     | 2.43     | 2.88   | 24.94    | 12.22    | 17.60    |
| MaNAC028    | 0.00   | 0.01     | 0.00     | 0.00     | 0.00   | 0.00     | 0.00     | 0.00     |
| MaNAC029    | 1.67   | 2.00     | 3.61     | 4.18     | 4.84   | 3.29     | 2.00     | 4.59     |
| MaNAC030    | 20.42  | 17.35    | 7.31     | 7.21     | 14.87  | 6.31     | 7.59     | 6.33     |
| MaNAC031    | 0.00   | 0.00     | 0.00     | 0.00     | 0.00   | 0.00     | 0.00     | 0.00     |
| MaNAC032    | 0.00   | 0.00     | 0.00     | 0.00     | 0.00   | 0.34     | 0.00     | 0.00     |
| MaNAC033    | 177.08 | 63.16    | 125.05   | 90.55    | 34.46  | 91.77    | 120.60   | 83.55    |
| MaNAC034    | 0.00   | 0.00     | 0.00     | 0.04     | 0.00   | 0.02     | 0.14     | 0.10     |
| MaNAC035    | 2.28   | 2.68     | 4.53     | 4.30     | 4.42   | 8.00     | 3.91     | 1.47     |
| MaNAC036    | 0.32   | 0.82     | 1.17     | 2.10     | 0.74   | 9.52     | 5.26     | 15.45    |
| MaNAC037    | 0.00   | 0.00     | 0.00     | 0.00     | 0.30   | 0.58     | 0.30     | 0.38     |
| MaNAC038    | 0.00   | 0.00     | 0.00     | 0.06     | 0.00   | 0.00     | 0.09     | 0.02     |
| MaNAC039    | 0.00   | 0.03     | 0.07     | 0.02     | 0.06   | 0.75     | 1.43     | 2.63     |
| MaNAC040    | 19.58  | 8.69     | 9.72     | 5.66     | 30.52  | 64.26    | 72.91    | 43.85    |
| MaNAC041    | 1.09   | 6.22     | 1.04     | 0.36     | 3.04   | 4.06     | 0.20     | 0.40     |
| MaNAC042    | 0.00   | 0.00     | 0.00     | 0.00     | 0.00   | 0.00     | 0.04     | 0.00     |
| MaNAC043    | 0.23   | 1.63     | 2.64     | 4.25     | 2.65   | 2.62     | 2.26     | 5.13     |
| MaNAC044    | 0.25   | 0.23     | 0.72     | 0.51     | 0.72   | 1.03     | 1.19     | 0.86     |
| MaNAC045    | 0.19   | 1.23     | 2.39     | 0.29     | 0.09   | 0.34     | 0.18     | 0.15     |
| MaNAC046    | 0.00   | 0.00     | 0.00     | 0.00     | 0.60   | 0.05     | 0.00     | 0.06     |
| MaNAC047    | 0.13   | 0.00     | 0.00     | 0.00     | 0.00   | 0.00     | 0.00     | 0.00     |

|          |        |        |         |         |       |        |        |        |
|----------|--------|--------|---------|---------|-------|--------|--------|--------|
| MaNAC048 | 1.29   | 1.26   | 2.15    | 3.52    | 3.49  | 1.83   | 2.66   | 6.04   |
| MaNAC049 | 0.00   | 0.00   | 0.00    | 0.00    | 0.00  | 0.00   | 0.00   | 0.00   |
| MaNAC050 | 0.00   | 0.00   | 0.00    | 0.00    | 0.00  | 0.00   | 0.00   | 0.00   |
| MaNAC051 | 2.14   | 3.59   | 5.30    | 5.77    | 6.86  | 4.89   | 6.98   | 13.12  |
| MaNAC052 | 0.00   | 0.01   | 0.00    | 0.00    | 0.07  | 0.01   | 0.00   | 0.00   |
| MaNAC053 | 0.80   | 1.33   | 0.29    | 0.33    | 0.43  | 0.35   | 0.24   | 0.34   |
| MaNAC054 | 0.00   | 0.11   | 0.46    | 0.44    | 0.36  | 2.44   | 3.38   | 2.05   |
| MaNAC055 | 0.00   | 0.00   | 0.00    | 0.00    | 0.20  | 0.06   | 0.00   | 0.00   |
| MaNAC056 | 0.00   | 0.18   | 0.30    | 0.20    | 0.01  | 0.04   | 0.10   | 0.20   |
| MaNAC057 | 1.32   | 0.74   | 0.37    | 0.67    | 5.14  | 1.43   | 0.23   | 1.82   |
| MaNAC058 | 47.30  | 39.92  | 12.20   | 13.96   | 20.43 | 38.01  | 22.86  | 27.65  |
| MaNAC059 | 0.00   | 0.00   | 0.00    | 0.04    | 0.03  | 0.00   | 0.00   | 0.00   |
| MaNAC060 | 66.86  | 13.29  | 1.70    | 0.55    | 13.67 | 8.84   | 5.18   | 6.36   |
| MaNAC061 | 0.26   | 0.31   | 0.24    | 0.28    | 0.08  | 0.04   | 0.05   | 0.08   |
| MaNAC062 | 0.28   | 0.02   | 0.00    | 0.00    | 0.14  | 0.00   | 0.00   | 0.00   |
| MaNAC063 | 0.25   | 0.02   | 0.00    | 0.01    | 0.27  | 0.02   | 0.08   | 0.11   |
| MaNAC064 | 2.24   | 1.27   | 0.35    | 0.39    | 2.30  | 0.20   | 0.04   | 0.06   |
| MaNAC065 | 0.07   | 0.08   | 0.05    | 0.05    | 1.14  | 0.30   | 0.10   | 0.28   |
| MaNAC066 | 0.97   | 1.30   | 1.57    | 2.16    | 6.30  | 2.66   | 1.85   | 3.73   |
| MaNAC067 | 1.96   | 2.05   | 1.41    | 0.30    | 1.53  | 1.74   | 2.76   | 2.39   |
| MaNAC068 | 1.85   | 15.65  | 5.86    | 1.50    | 2.68  | 15.04  | 1.77   | 4.29   |
| MaNAC069 | 0.00   | 0.00   | 0.00    | 0.00    | 0.00  | 0.00   | 0.00   | 0.00   |
| MaNAC070 | 1.49   | 2.52   | 3.80    | 5.52    | 3.51  | 3.23   | 2.59   | 3.77   |
| MaNAC071 | 0.08   | 0.00   | 0.05    | 0.01    | 0.01  | 0.01   | 0.02   | 0.11   |
| MaNAC072 | 0.00   | 0.03   | 0.00    | 0.05    | 0.16  | 0.51   | 0.15   | 0.16   |
| MaNAC073 | 0.14   | 0.16   | 0.50    | 0.59    | 0.43  | 0.22   | 0.41   | 1.14   |
| MaNAC074 | 33.65  | 127.45 | 159.91  | 198.63  | 31.46 | 170.31 | 116.95 | 86.65  |
| MaNAC075 | 117.74 | 3.69   | 0.86    | 0.30    | 40.52 | 3.21   | 3.32   | 1.68   |
| MaNAC076 | 0.96   | 0.64   | 8.27    | 12.81   | 0.39  | 0.71   | 0.85   | 1.59   |
| MaNAC077 | 0.33   | 0.00   | 0.00    | 0.00    | 0.06  | 0.00   | 0.00   | 0.00   |
| MaNAC078 | 82.54  | 52.29  | 9.76    | 15.78   | 59.27 | 136.95 | 35.12  | 32.48  |
| MaNAC079 | 0.00   | 0.00   | 0.00    | 0.00    | 0.00  | 0.00   | 0.00   | 0.00   |
| MaNAC080 | 0.00   | 0.04   | 0.00    | 0.05    | 0.08  | 0.00   | 0.00   | 0.00   |
| MaNAC081 | 0.13   | 1.03   | 0.02    | 0.00    | 0.24  | 0.07   | 0.00   | 0.00   |
| MaNAC082 | 12.41  | 9.45   | 7.38    | 12.28   | 15.63 | 11.39  | 13.49  | 12.97  |
| MaNAC083 | 31.84  | 10.31  | 185.94  | 298.85  | 3.25  | 11.02  | 62.87  | 34.92  |
| MaNAC084 | 0.14   | 23.34  | 13.05   | 5.11    | 0.20  | 7.05   | 14.57  | 12.70  |
| MaNAC085 | 107.84 | 19.09  | 17.25   | 18.38   | 11.16 | 0.96   | 0.14   | 1.54   |
| MaNAC086 | 20.78  | 1.45   | 0.08    | 0.08    | 3.09  | 1.83   | 0.06   | 0.00   |
| MaNAC087 | 4.34   | 8.13   | 7.08    | 8.28    | 0.18  | 4.64   | 12.18  | 9.87   |
| MaNAC088 | 0.04   | 0.00   | 0.05    | 0.05    | 0.01  | 0.06   | 0.00   | 0.02   |
| MaNAC089 | 0.53   | 0.11   | 0.08    | 0.00    | 0.57  | 0.12   | 0.03   | 0.00   |
| MaNAC090 | 1.12   | 0.38   | 0.00    | 0.00    | 6.42  | 0.18   | 0.00   | 0.00   |
| MaNAC091 | 1.93   | 1.84   | 0.52    | 0.11    | 1.99  | 4.39   | 1.80   | 0.84   |
| MaNAC092 | 0.00   | 0.21   | 5.47    | 5.65    | 0.14  | 15.44  | 19.52  | 20.40  |
| MaNAC093 | 0.55   | 0.24   | 0.15    | 0.11    | 0.21  | 0.15   | 0.10   | 0.21   |
| MaNAC094 | 4.38   | 231.70 | 1190.96 | 1402.10 | 31.76 | 735.50 | 704.54 | 926.00 |
| MaNAC095 | 34.36  | 123.06 | 419.77  | 560.32  | 48.69 | 382.70 | 630.08 | 455.56 |
| MaNAC096 | 0.00   | 0.02   | 0.00    | 0.00    | 0.00  | 0.02   | 0.00   | 0.00   |
| MaNAC097 | 0.00   | 0.00   | 0.00    | 0.00    | 0.00  | 0.00   | 0.00   | 0.00   |
| MaNAC098 | 0.21   | 0.06   | 0.02    | 0.03    | 6.86  | 1.18   | 0.57   | 0.87   |

|          |        |        |        |        |        |        |         |        |
|----------|--------|--------|--------|--------|--------|--------|---------|--------|
| MaNAC099 | 0.00   | 0.00   | 0.13   | 0.48   | 0.04   | 0.00   | 0.00    | 0.12   |
| MaNAC100 | 0.22   | 0.01   | 0.02   | 0.00   | 1.02   | 0.03   | 0.00    | 0.00   |
| MaNAC101 | 0.00   | 0.00   | 0.00   | 0.00   | 0.00   | 0.00   | 0.00    | 0.00   |
| MaNAC102 | 0.00   | 0.00   | 0.00   | 0.00   | 0.02   | 0.02   | 0.00    | 0.01   |
| MaNAC103 | 0.25   | 0.62   | 26.79  | 43.70  | 4.20   | 1.29   | 6.73    | 9.07   |
| MaNAC104 | 0.02   | 0.12   | 0.14   | 0.10   | 0.32   | 1.03   | 0.83    | 0.62   |
| MaNAC105 | 0.02   | 0.01   | 0.05   | 0.02   | 0.02   | 0.05   | 0.02    | 0.15   |
| MaNAC106 | 220.85 | 81.32  | 42.66  | 14.92  | 25.77  | 27.45  | 54.85   | 16.02  |
| MaNAC107 | 13.07  | 41.41  | 13.52  | 5.16   | 48.63  | 38.88  | 4.94    | 8.08   |
| MaNAC108 | 2.46   | 2.61   | 1.16   | 0.35   | 2.94   | 4.25   | 1.54    | 0.41   |
| MaNAC109 | 0.05   | 0.15   | 0.20   | 0.29   | 0.00   | 0.00   | 0.16    | 0.07   |
| MaNAC110 | 1301.7 | 294.90 | 36.46  | 16.41  | 83.06  | 194.49 | 113.26  | 55.50  |
|          | 8      |        |        |        |        |        |         |        |
| MaNAC111 | 195.96 | 84.03  | 34.88  | 35.45  | 389.95 | 72.11  | 76.80   | 129.86 |
| MaNAC112 | 0.00   | 0.00   | 0.00   | 0.00   | 1.16   | 2.45   | 1.69    | 1.65   |
| MaNAC113 | 0.47   | 4.56   | 7.65   | 3.87   | 0.65   | 14.90  | 26.44   | 33.30  |
| MaNAC114 | 0.00   | 0.03   | 0.00   | 0.00   | 0.09   | 0.00   | 0.00    | 0.06   |
| MaNAC115 | 0.64   | 0.90   | 0.55   | 0.78   | 0.86   | 3.13   | 6.17    | 6.52   |
| MaNAC116 | 2.47   | 0.00   | 0.12   | 0.52   | 0.13   | 0.00   | 0.00    | 0.00   |
| MaNAC117 | 0.00   | 0.00   | 0.02   | 0.00   | 0.00   | 0.00   | 0.05    | 0.01   |
| MaNAC118 | 0.28   | 0.09   | 0.00   | 0.02   | 0.14   | 0.00   | 0.14    | 0.02   |
| MaNAC119 | 0.08   | 0.01   | 0.05   | 0.05   | 0.00   | 0.07   | 0.06    | 0.03   |
| MaNAC120 | 0.09   | 0.01   | 0.00   | 0.00   | 1.46   | 0.05   | 0.00    | 0.00   |
| MaNAC121 | 0.00   | 0.00   | 0.00   | 0.00   | 0.00   | 0.00   | 0.00    | 0.00   |
| MaNAC122 | 3.79   | 2.52   | 0.70   | 0.94   | 4.28   | 13.36  | 8.00    | 11.18  |
| MaNAC123 | 19.27  | 22.05  | 15.99  | 16.78  | 15.45  | 28.13  | 28.12   | 24.30  |
| MaNAC124 | 0.00   | 0.00   | 0.20   | 0.17   | 0.00   | 0.02   | 0.49    | 0.74   |
| MaNAC125 | 0.34   | 0.36   | 0.04   | 0.00   | 6.46   | 6.37   | 2.19    | 1.98   |
| MaNAC126 | 0.00   | 0.00   | 0.00   | 0.00   | 0.00   | 0.00   | 0.00    | 0.00   |
| MaNAC127 | 49.99  | 59.09  | 1.69   | 0.55   | 23.30  | 100.84 | 15.02   | 12.36  |
| MaNAC128 | 0.02   | 0.00   | 0.00   | 0.01   | 0.06   | 0.02   | 0.10    | 0.08   |
| MaNAC129 | 312.58 | 334.86 | 890.71 | 889.67 | 30.72  | 757.93 | 1449.98 | 937.38 |
| MaNAC130 | 0.00   | 0.00   | 0.14   | 0.40   | 0.08   | 0.04   | 0.02    | 0.08   |
| MaNAC131 | 174.54 | 537.14 | 137.41 | 74.36  | 46.11  | 520.61 | 275.32  | 158.75 |
| MaNAC132 | 0.00   | 0.00   | 0.00   | 0.00   | 0.00   | 0.00   | 0.00    | 0.00   |
| MaNAC133 | 10.07  | 5.50   | 5.18   | 4.47   | 1.37   | 2.88   | 8.48    | 10.13  |
| MaNAC134 | 0.00   | 0.00   | 0.00   | 0.00   | 0.00   | 0.00   | 0.00    | 0.00   |
| MaNAC135 | 0.86   | 0.03   | 0.01   | 0.02   | 0.03   | 0.00   | 0.00    | 0.00   |
| MaNAC136 | 4.05   | 8.56   | 19.26  | 29.43  | 11.88  | 5.97   | 11.16   | 13.55  |
| MaNAC137 | 21.15  | 40.31  | 28.59  | 21.41  | 38.10  | 24.81  | 23.55   | 18.61  |
| MaNAC138 | 0.00   | 0.00   | 0.00   | 0.00   | 0.00   | 0.00   | 0.00    | 0.00   |
| MaNAC139 | 5.65   | 0.44   | 0.56   | 0.83   | 0.40   | 0.13   | 0.20    | 0.34   |
| MaNAC140 | 56.87  | 23.62  | 22.63  | 12.23  | 20.54  | 17.69  | 19.23   | 9.93   |
| MaNAC141 | 18.85  | 1.43   | 0.05   | 0.05   | 4.28   | 0.52   | 0.08    | 0.00   |
| MaNAC142 | 0.00   | 0.12   | 0.00   | 0.17   | 0.11   | 0.07   | 0.00    | 0.00   |
| MaNAC143 | 0.00   | 0.00   | 0.00   | 0.00   | 0.00   | 0.00   | 0.00    | 0.00   |
| MaNAC144 | 0.00   | 0.00   | 0.00   | 0.00   | 0.00   | 0.00   | 0.00    | 0.00   |
| MaNAC145 | 0.00   | 0.00   | 0.00   | 0.00   | 0.92   | 0.02   | 0.01    | 0.01   |
| MaNAC146 | 10.04  | 10.27  | 6.82   | 8.38   | 7.32   | 5.88   | 7.15    | 6.93   |
| MaNAC147 | 28.62  | 1.77   | 3.98   | 10.42  | 29.09  | 1.93   | 1.43    | 1.92   |
| MaNAC148 | 0.00   | 0.00   | 0.00   | 0.00   | 3.03   | 0.16   | 0.30    | 0.81   |

|          |        |        |       |       |        |       |       |       |
|----------|--------|--------|-------|-------|--------|-------|-------|-------|
| MaNAC149 | 0.14   | 0.31   | 0.49  | 0.34  | 0.00   | 3.26  | 11.02 | 14.69 |
| MaNAC150 | 0.00   | 0.01   | 0.12  | 0.09  | 0.00   | 0.00  | 0.00  | 0.04  |
| MaNAC151 | 0.00   | 0.00   | 0.02  | 0.00  | 0.10   | 0.11  | 0.07  | 0.00  |
| MaNAC152 | 0.00   | 0.09   | 0.11  | 0.00  | 0.19   | 0.92  | 4.65  | 2.82  |
| MaNAC153 | 384.27 | 164.13 | 17.39 | 8.48  | 137.98 | 27.66 | 4.65  | 9.51  |
| MaNAC154 | 11.46  | 5.76   | 3.37  | 1.85  | 7.69   | 38.35 | 10.82 | 8.88  |
| MaNAC155 | 0.00   | 0.00   | 0.00  | 0.00  | 0.00   | 0.00  | 0.00  | 0.00  |
| MaNAC156 | 16.74  | 8.25   | 2.07  | 1.21  | 41.82  | 37.90 | 10.34 | 13.59 |
| MaNAC157 | 0.00   | 0.00   | 0.66  | 0.90  | 0.04   | 0.00  | 0.07  | 0.07  |
| MaNAC158 | 0.00   | 0.00   | 0.00  | 0.00  | 0.03   | 0.00  | 0.07  | 0.00  |
| MaNAC159 | 0.09   | 0.00   | 0.00  | 0.00  | 0.00   | 0.00  | 0.00  | 0.00  |
| MaNAC160 | 0.00   | 0.00   | 0.00  | 0.00  | 0.00   | 0.00  | 0.00  | 0.00  |
| MaNAC161 | 0.00   | 0.00   | 0.03  | 0.00  | 0.02   | 0.02  | 0.00  | 0.04  |
| MaNAC162 | 0.36   | 0.71   | 0.29  | 0.24  | 2.16   | 0.64  | 0.20  | 0.99  |
| MaNAC163 | 0.17   | 0.15   | 0.06  | 0.12  | 1.69   | 0.05  | 0.07  | 0.02  |
| MaNAC164 | 4.40   | 0.73   | 0.04  | 0.02  | 5.82   | 0.62  | 0.25  | 0.42  |
| MaNAC165 | 0.00   | 0.00   | 0.00  | 0.00  | 0.00   | 0.00  | 0.00  | 0.00  |
| MaNAC166 | 0.05   | 0.03   | 0.00  | 0.04  | 0.00   | 0.02  | 0.03  | 0.00  |
| MaNAC167 | 0.00   | 0.00   | 0.00  | 0.00  | 0.00   | 0.00  | 0.00  | 0.00  |
| MaNAC168 | 0.00   | 0.00   | 0.00  | 0.00  | 0.00   | 0.00  | 0.00  | 0.00  |
| MaNAC169 | 1.62   | 1.96   | 8.06  | 10.82 | 2.29   | 2.17  | 3.94  | 5.81  |
| MaNAC170 | 0.00   | 0.00   | 0.00  | 0.00  | 0.00   | 0.00  | 0.00  | 0.00  |
| MaNAC171 | 4.09   | 13.11  | 13.91 | 15.58 | 10.78  | 8.18  | 12.54 | 11.73 |
| MaNAC172 | 0.00   | 0.00   | 0.00  | 0.00  | 0.00   | 0.00  | 0.00  | 0.00  |
| MaNAC173 | 0.09   | 0.07   | 0.11  | 0.02  | 0.07   | 0.02  | 0.01  | 0.01  |
| MaNAC174 | 0.25   | 0.19   | 1.12  | 1.71  | 0.23   | 0.59  | 0.18  | 0.11  |
| MaNAC175 | 0.00   | 0.03   | 0.63  | 0.03  | 0.12   | 0.00  | 0.00  | 0.00  |
| MaNAC176 | 6.13   | 2.48   | 0.62  | 0.24  | 0.07   | 0.00  | 0.00  | 0.00  |
| MaNAC177 | 6.90   | 2.25   | 0.12  | 0.02  | 15.90  | 9.72  | 1.66  | 6.14  |
| MaNAC178 | 0.18   | 0.55   | 0.70  | 1.27  | 0.34   | 2.89  | 2.55  | 5.60  |
| MaNAC179 | 27.53  | 11.53  | 2.24  | 3.21  | 18.49  | 9.26  | 14.52 | 16.98 |
| MaNAC180 | 0.19   | 0.00   | 0.00  | 0.00  | 0.00   | 0.00  | 0.00  | 0.00  |
| MaNAC181 | 0.00   | 0.00   | 0.01  | 0.04  | 0.08   | 0.05  | 0.00  | 0.02  |



Table S6. The primer sequences used for RT-PCR.

| Genes    | Primer sequence (5' to 3')                         |
|----------|----------------------------------------------------|
| MaNAC094 | F: GCAACCATCTACACCACCGA<br>R: GCTGATTGAAGAAGCGCTGG |
| MaNAC129 | F: CAAGGGGAGCAAGACGAACT<br>R: TTGTAGCAGTTGCTCCTCCG |
| MaNAC009 | F: CGAAGCTCTGAGGAGCAACA<br>R: TAGATTCGGCAGAGGACCCA |
| MaNAC095 | F: TTCCCGGAGGTGGATGATCT<br>R: AAGTCCACGAACCAATCGCT |
| MaNAC074 | F: ATCACGTCTTCCTGGTGCAG<br>R: GCTTTCCCCGGTAGAAGACC |
| MaNAC103 | F: GGTAGGGGACGAGTGGTACT<br>R: GGTGGCTCTGTTTGTCTCA  |
| MaNAC083 | F: GAAAGTCTTCTGCTGCCCCT<br>R: CCCATGGATCGAGTTTTGCG |
| MaNAC035 | F: CGAAGAGCTCGTGGTTCAGT<br>R: AGGTCGAGGTCAGGGATGAA |
| MaNAC016 | F: GCCCGAGAAGACAAACTGGA<br>R: CCACCAACTCTCCGTCCTTC |
| MaNAC087 | F: GCAGGCGTGAAGTTTGATCC                            |

F, forward; R. reverse

Table S7. The primer sequences used for used for subcellular localization.

| Genes    | Primer sequence (5' to 3')                                                                     |
|----------|------------------------------------------------------------------------------------------------|
| MaNAC094 | F: GGGGATCCTCTAGAGTCGACATGTCGGATCCTGCGTCG<br>R: CTCACCATCTGCAGGTCGACATGTAATCCCAGCTGAGG         |
| MaNAC129 | F: GGGGATCCTCTAGAGTCGACATGTCGGATCCCGCGTCT<br>R: CTCACCATCTGCAGGTCGACCAGATGAGAGCCGGGCAG         |
| MaNAC009 | F: GGGGATCCTCTAGAGTCGACATGTCGAATCCGACCAGTCTTC<br>R: CTCACCATCTGCAGGTCGACCATCTCGTATGCTGCTTTG    |
| MaNAC095 | F: GGGGATCCTCTAGAGTCGACATGGGGAGGAGGACGAGAGA<br>R: CTCACCATCTGCAGGTCGACCATAGATGGGAAGAAGCAGC     |
| MaNAC074 | F: GGGGATCCTCTAGAGTCGACATGGACAGGAAGCCGAGTG<br>R: CTCACCATCTGCAGGTCGACTGGAAGTGATCTGCTAGAGCTG    |
| MaNAC103 | F: GGGGATCCTCTAGAGTCGACATGCTCAGGTTGATGATCGAGG<br>R: CTCACCATCTGCAGGTCGACGTAGTTCCATGACAGCACATCG |
| MaNAC083 | F: GGGGATCCTCTAGAGTCGACATGGAGAGCAAGCCAAGCTT<br>R: CTCACCATCTGCAGGTCGACGGGCTCACTTCCTTGTGG       |
| MaNAC035 | F: GGGGATCCTCTAGAGTCGACATGGACAACAAGCCACGCC<br>R: CTCACCATCTGCAGGTCGACGCTGCCAGAAGTGGTTCC        |
| MaNAC016 | F: GGGGATCCTCTAGAGTCGACATGGTTTCCATCAGCAAGAAGTC<br>R: CTCACCATCTGCAGGTCGACGGAAAGGAAGGGAGGAGG    |
| MaNAC087 | F: GGGGATCCTCTAGAGTCGACATGGTTCTAATCACCAAGAAATCAC                                               |

F, forward; R, reverse
